# Supplementary material for: Impact of alternating amino acid sequences on beta-amyloid-induced neurotoxicity and neuroinflammation in Alzheimer's disease
Source: publisher site journal article supplement (doi:10.18632/aging.205095), 2023-10-10
Supplement: Supplementary file [file aging-v15i19-205095-supplementary-material-SD1.pdf]

## SUPPLEMENTARY TABLE

**Supplementary Table 1. Primer sequences used for qRT-PCR in this work.**

| <b>Gene name</b>    | <b>Primer sequences (5'–3')</b>                                       |
|---------------------|-----------------------------------------------------------------------|
| Mouse-IL-1 $\beta$  | Forward: TGGCAACTGTTCTG<br>Reverse: GGAAGCAGCCCTTCATCTTT              |
| Mouse-TNF $\alpha$  | Forward: GCCTCTTCTCATTCTGCTT<br>Reverse: TGGGAACTTCTCATCCCTTTG        |
| Mouse-IFN- $\gamma$ | Forward: CTCATGGCTGTTTCTGGCTG<br>Reverse: CCTTTTGCCAGTTCCTCCAG        |
| Mouse-Rps18         | Forward: GGATGTGAAGGATGGGAAGT<br>Reverse: CCCTCTATGGGCTCGAATTT        |
| Mouse-IL-6          | Forward: GACAAAGCCAGAGTCCTTCAGAGAG<br>Reverse: CTAGGTTTGCCGAGTAGATCTC |
